# Supplementary material
Source: PubMed Central journal article supplement (PMC8415255)
Supplement: NIHMS1734857-supplement-1.pdf [file NIHMS1734857-supplement-1.pdf]

**Neuron, Volume 99**

**Supplemental Information**

**Enhanced Neural Processing by Covert**

**Attention only during Microsaccades**

**Directed toward the Attended Stimulus**

**Eric Lowet, Bruno Gomes, Karthik Srinivasan, Huihui Zhou, Robert John  
Schafer, and Robert Desimone**

1 **SUPPLEMENTAL INFORMATION**

2

3 **Enhanced neural processing by covert attention only during microsaccades**  
4 **directed towards the attended stimulus**

5 Eric Lowet, Bruno Gomes, Karthik Srinivasan<sup>1</sup>, Huihui Zhou, Robert John Schafer, Robert  
6 Desimone

7

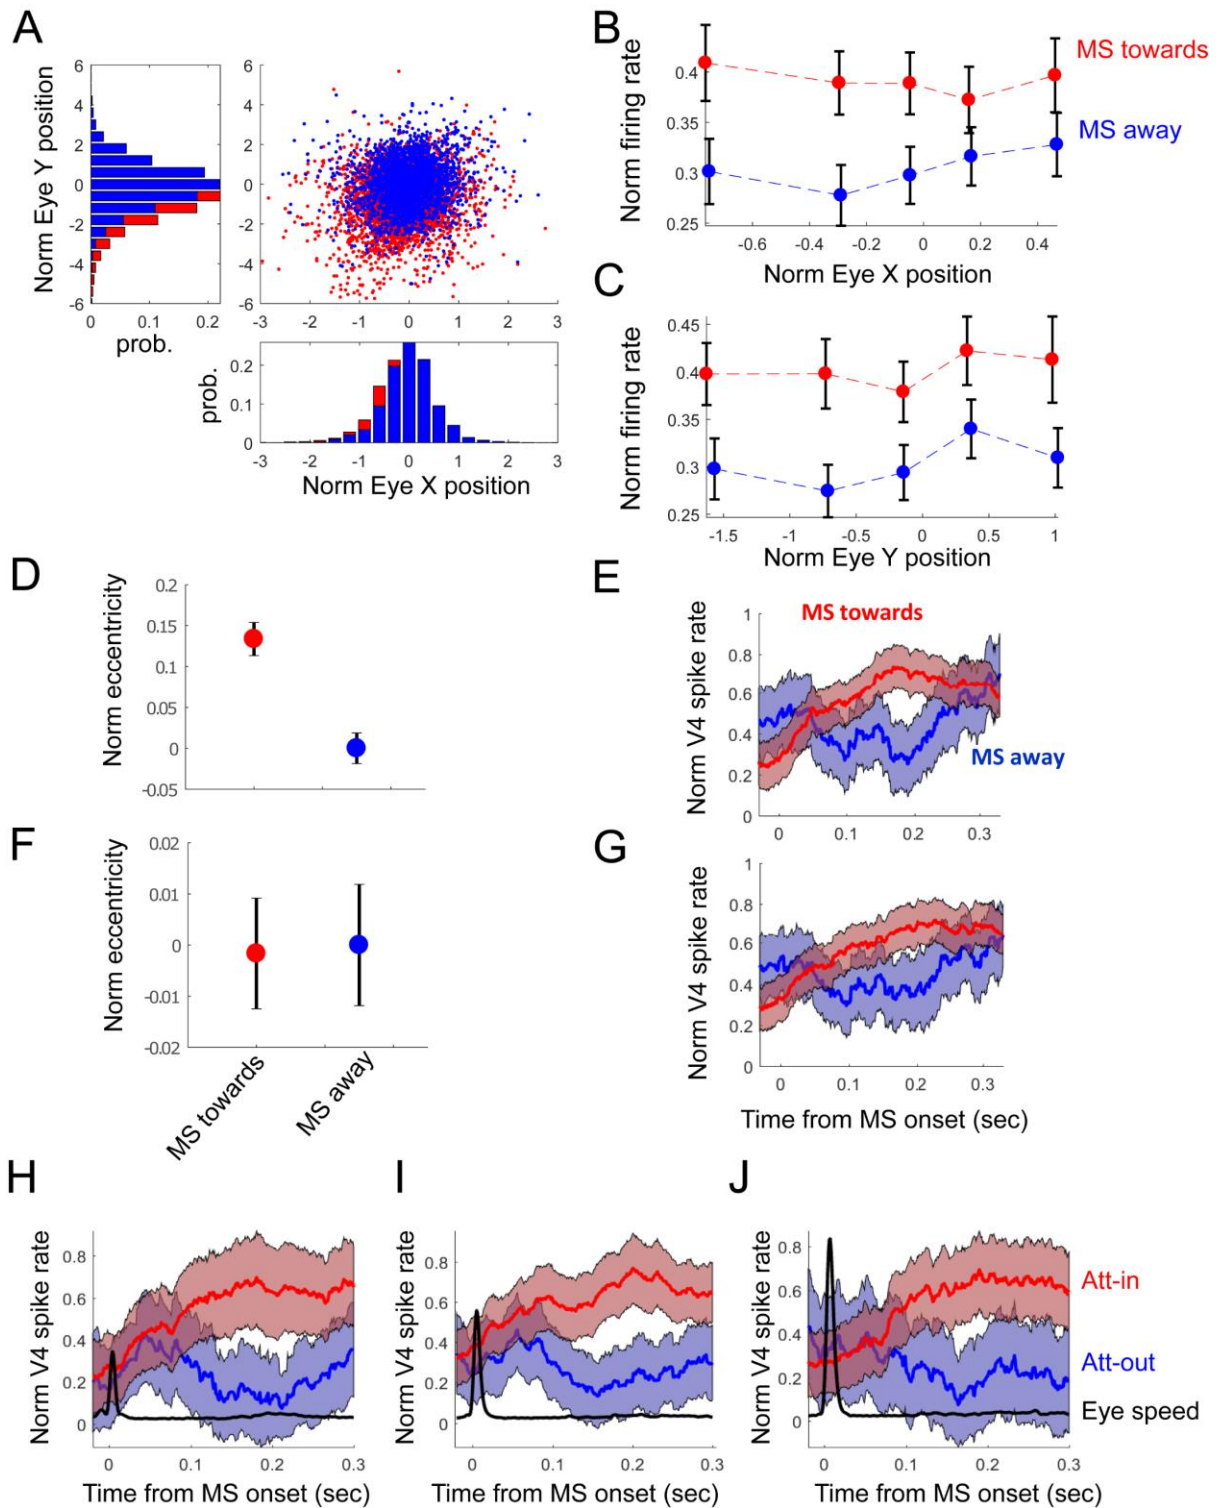

8

9

10

11 **Figure S1. Related to Figure 2.** Control for eye position comparing MS directed towards or  
 12 away from cued stimulus. **A)** The marginal and joint population distribution of X and Y eye  
 13 position for MS towards (red) and MS away (blue) from cued stimulus (attention-in condition,  
 14 which is attending to the stimulus covering V4 RF located in the lower left quadrant). **(B-C)**

15 Fine grain eye position analysis of MS-direction dependent V4 attentional modulation. X and  
16 Y eye positions were subtracted and normalized by the mean and variance of positions from  
17 MS away windows. **(B)** Population-averaged V4 firing rate for time-windows 100ms-250ms  
18 after MS either directed towards (red) or away (blue) from cued stimulus. Population data was  
19 grouped into 5 groups (20% percentile steps) dividing equally the X eye position distribution  
20 **(C)** Same as **(B)**, but for Y eye position. **(D-G)** Eye position eccentricity is computed by taken  
21 the squared distance of X and Y eye position during stimulus presentation relative to X and Y  
22 in the fixation baseline. The eye position eccentricities were computed for MS towards and MS  
23 away from the cued stimulus. The values were normalized to the mean value of the MS away  
24 population to reduce variability between sessions and monkeys. **(D)** The averaged normalized  
25 eye position eccentricity (sessions=20), for MS towards and away from the cued stimulus. (t-  
26 test,  $p = 1.5 \times 10^{-6}$ ). **(E)** The population-averaged V4 firing rate for the two different MS  
27 directions (t-test for interval 150-300ms after MS,  $p = 8.27 \times 10^{-8}$ , neurons =253). Shaded area  
28 is  $\pm$ SE. **(F)** The averaged normalized eccentricity after equalization (t-test,  $p = 0.75$ ). **(G)**  
29 Despite the equalization for eccentricity, the firing-rate modulation persisted (t-test for interval  
30 100-200 ms after MS,  $p = 0.0024$ ). **(H-J)** Effect of MS amplitude on attention effect. **(H)**  
31 Normalized population averaged V4 firing rate for MS towards the cued stimulus. Only MSs  
32 that were between the 5<sup>th</sup> and 35<sup>th</sup> percentile of the MS amplitude distribution we chosen. **(I)**  
33 Same as **(H)**, but for MS lying between the 35<sup>th</sup> and 65<sup>th</sup> percentile of the MS amplitude  
34 distributions. **(J)** Same as **(H)**, but for MSs lying between the 65<sup>th</sup> and 95<sup>th</sup> percentile of the MS  
35 amplitude distributions.

36

37

38

39

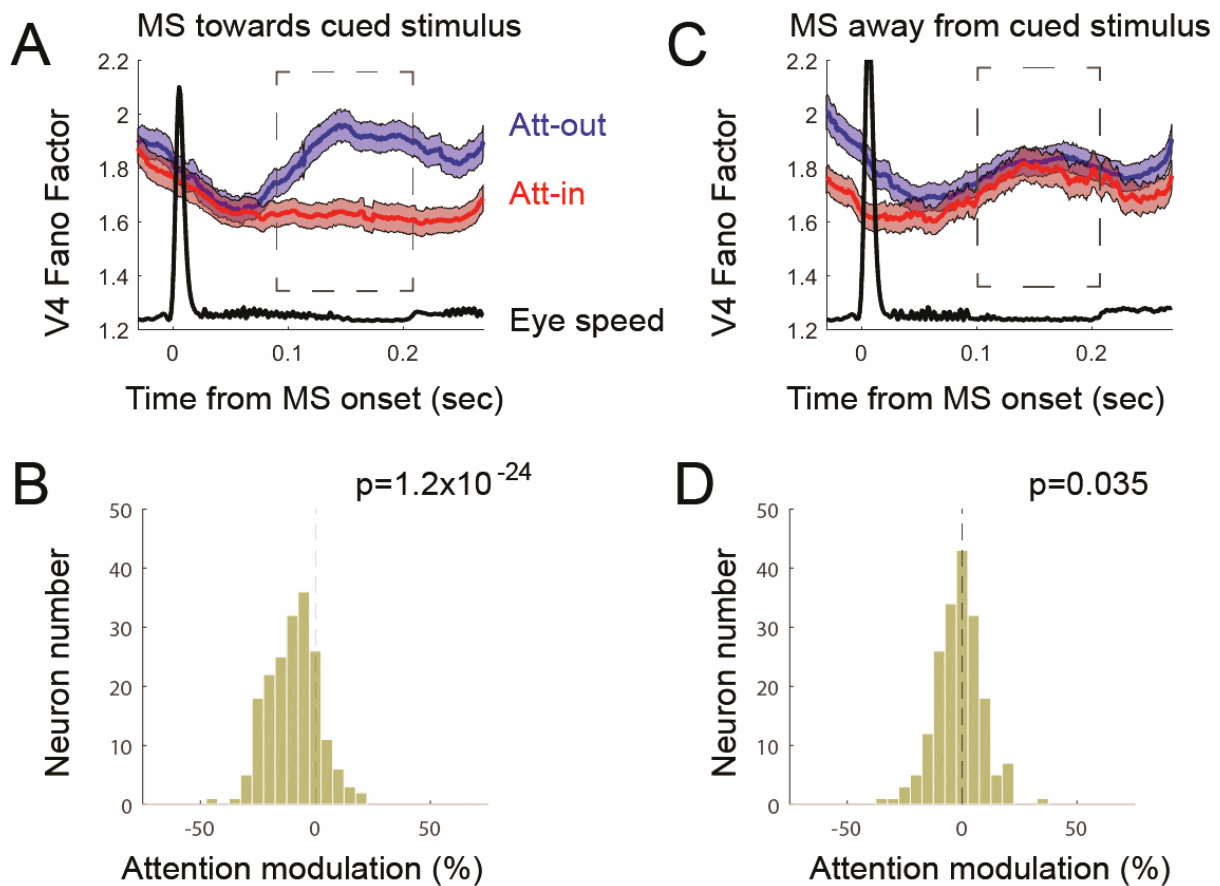

40

41 **Figure S2. Related to Figure 2.** Attention and MS modulation of the Fano-factor. **(A-B)** MS  
 42 towards cued stimulus. **(A)** Population-averaged V4 firing rate over time references to MS  
 43 onset. Att-in (red) is if cue was directed to the stimulus covering RF, whereas att-out (blue) is  
 44 if cue was directed to stimulus outside RF. Black line is trial-averaged eye speed. Shaded area  
 45 is  $\pm$ SE. Dashed rectangular window represents the time period for quantifying attentional  
 46 modulation. **(B)** Attention modulation  $(A-U)/(A+U)$  expressed in percent for each neuron  
 47 ( $n=253$ ) computed 100-200 ms after MS onset. Statistics were computed using t-test. **(C-D)**  
 48 Same as **(A-B)**, but for MS directed away from cued stimulus.

49

50

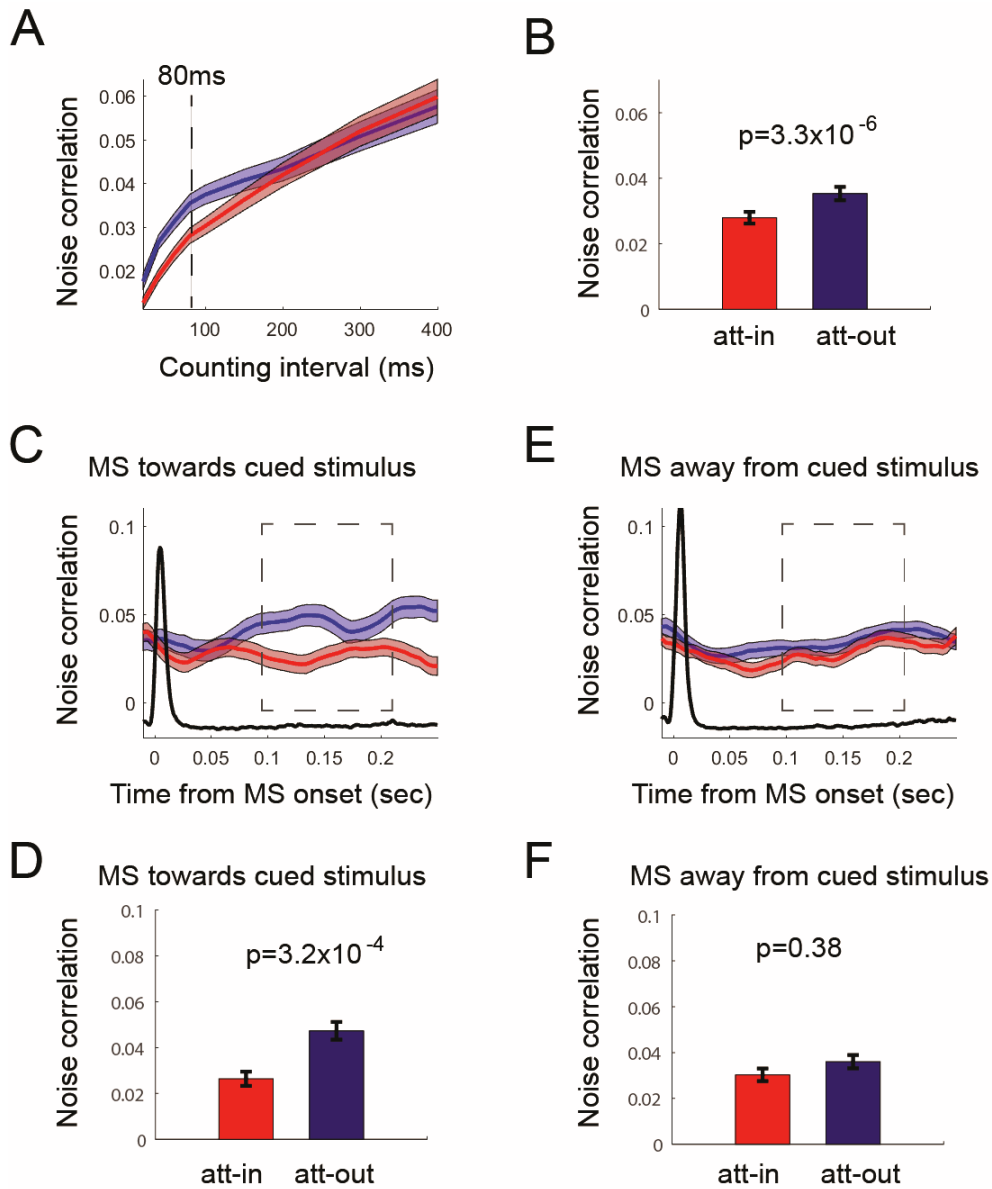

51

52 **Figure S3. Related to Figure 2.** Attention and MS modulation of noise correlation. (A) V4  
 53 neuronal noise correlation (NC) (n=460) as a function of counting interval. Red line is att-in  
 54 and blue line is att-out. Shaded area is  $\pm$ SE. (B) The attention effect (t-test) for counting interval  
 55 80 ms. (C) Time-resolved NC for MS-locked windows directed towards cued stimulus. (D)  
 56 Attentional effect (t-test) for time period 100-200 ms after MS directed towards cued stimulus.  
 57 (E-F) Same as (C-D), but for MS directed away.

58

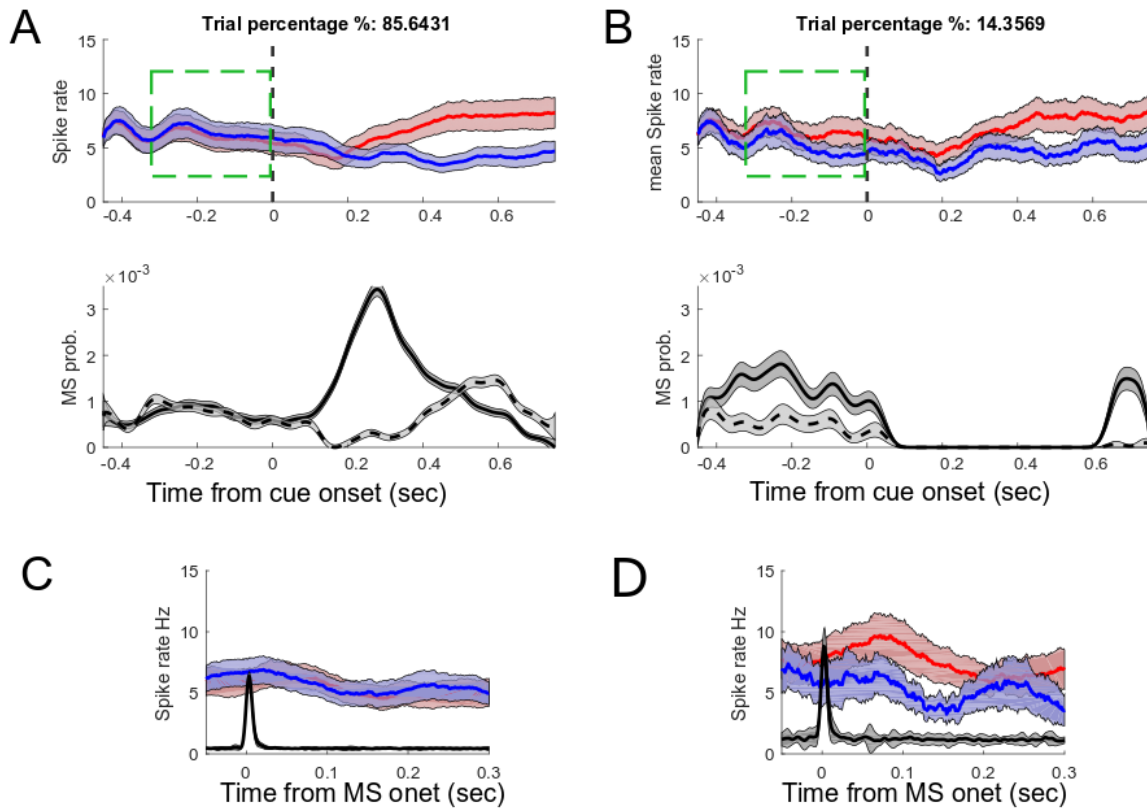

59

60 **Figure S4. Related to Figure 4.** Related to Figure 4. Comparison of trials with or without MS  
 61 within 600 ms window after cue. (A) Trials with a MS after the cue (~83% of total number of  
 62 trials). Upper plot: Red line is att-in and blue line is att-out population spike rate. Shaded area  
 63 is  $\pm$ SE. The green dashed line represents the period used to detect MS for subplot B). Black  
 64 dashed line represents cue onset. Lower plot: Dark line is the occurrence probability of MS  
 65 towards the cued stimulus and lighter line is the occurrence probability of MS away from the  
 66 cued stimulus. Black line is eye speed. Shaded area is  $\pm$ SE. (B) The population averaged spike  
 67 rate for att-in (red line) and att-out (blue line) as a function of MS onset towards the to-be-  
 68 attended stimulus in the period before the cue onset (green dashed box in A), from -300 ms to  
 69 0 ms). Only trials were considered if a MS was detected after the cue (*MS before cue + MS*  
 70 *after cue*). (C) as in (A), but only trials with no MS after the cue (~17% of total number of  
 71 trials). (D) As in (B), but only trials where considered if no detected MS after the cue (*MS*  
 72 *before cue + no MS after cue*).

73

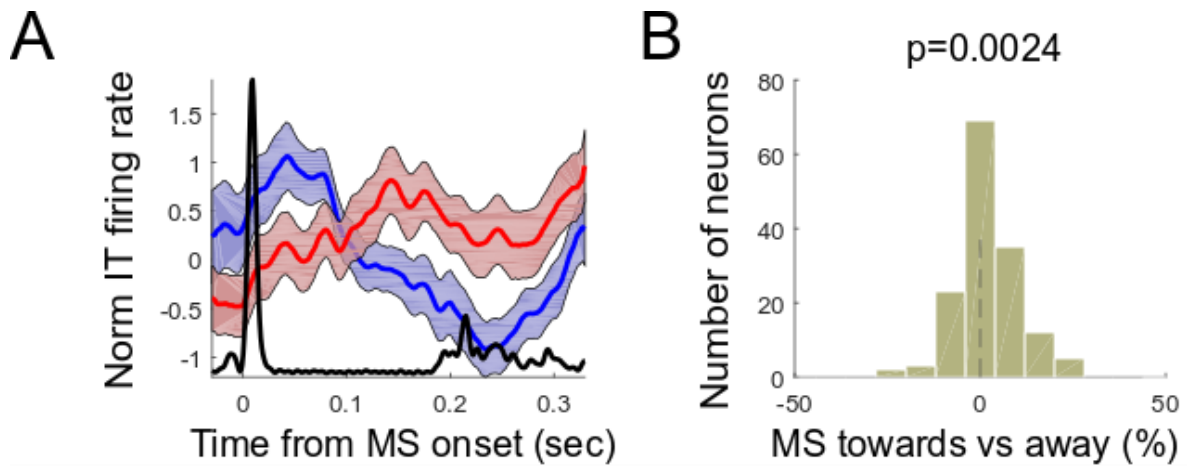

74

75 **Figure S5. Related to Figure 5.** Modulation of IT firing rate by MS. (A) IT firing rate  
 76 modulation with MS towards or away from attended stimuli (averaged across attention  
 77 conditions). IT firing rate was normalized using the mean rate from MS away time windows.  
 78 Shaded area is  $\pm$ SE. Black line is averaged eye speed. (B) Averaged from 100ms to 250 after  
 79 MS onset, the firing rate modulation  $(MS_{towards} - MS_{away}) / (MS_{towards} + MS_{away})$  for each neuron  
 80 is computed and shown in a population histogram. The firing rate modulation histogram  
 81 deviated significantly from a zero distribution (t-test,  $p=0.0024$ ) with increased firing rate  
 82 probability for time windows after a MS towards attended stimuli.

83
